# Supplementary material for: Iridium nanoparticles supported in polymeric membranes: a new material for hydrogenation reactions
Source: Royal Society of Chemistry journal article supplement (doi:10.1039/c5ra16426e), 2015-01-01
Supplement: c5ra16426e1.pdf [file c5ra16426e1.pdf]

**Support Information for**

# **Iridium Nanoparticles Supported in Polymeric Membranes: A New Material for Hydrogenation Reactions**

Vinícius W. Faria<sup>a</sup>, Marcos F. Brunelli<sup>a</sup> and Carla W. Scheeren<sup>a\*</sup>

<sup>a</sup>Laboratory of Catalysis, School of Chemistry and Food, Universidade Federal do Rio Grande-FURG, Rua Barão do Cai, 125, 95500-000 Santo Antônio da Patrulha, RS, Brazil. \*E-mail: carlascheeren@gmail.com

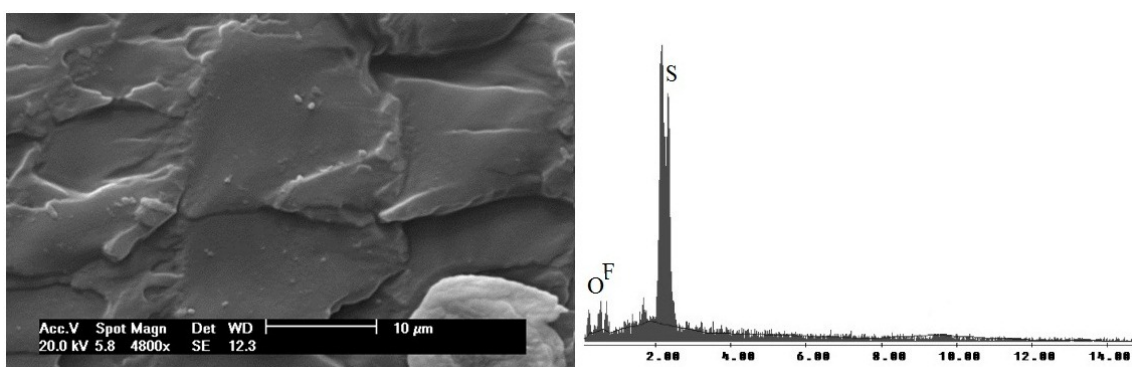

**Figure S1.** SEM and EDS of CA/IL polymeric membrane with 1.0 g of IL [BMLN(Tf)<sub>2</sub>].

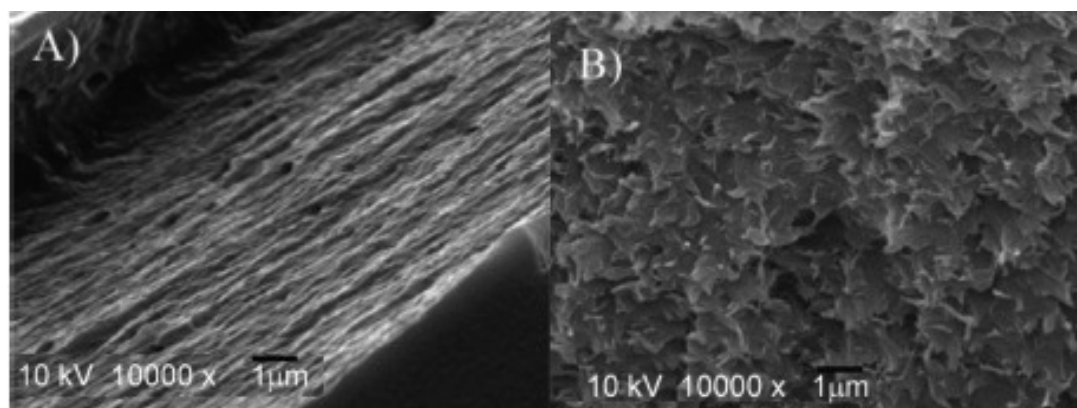

**Figure S2.** SEM micrographs illustrating the polymeric membranes of (A) CA/IL polymeric membrane and (B) pure cellulose (CA).

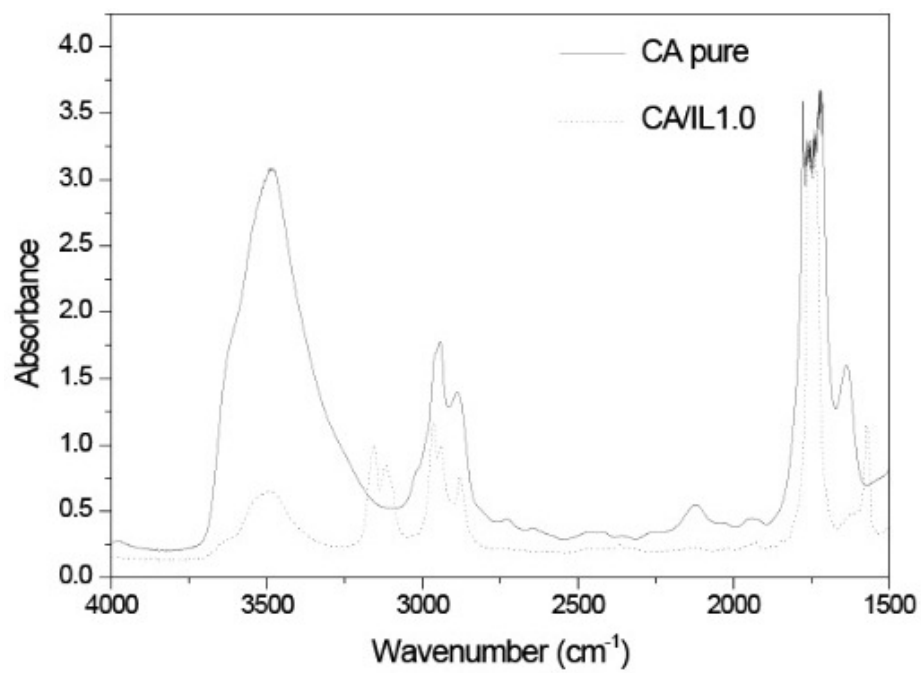

**Figure S3.** Infrared spectra of the pure cellulose (CA) and CA/IL polymeric membrane, containing 1.0g of IL [BMI.N(Tf)<sub>2</sub>].
